# Supplementary material for: Controllable deposition of Pt nanoparticles into a KL zeolite by atomic layer deposition for highly efficient reforming of n-heptane to aromatics
Source: Royal Society of Chemistry journal article supplement (doi:10.1039/c6cy02652d), 2017-01-01
Supplement: c6cy02652d1.pdf [file c6cy02652d1.pdf]

## Supporting Information

### Controllable deposition of Pt nanoparticles into KL zeolite by atomic layer deposition for highly efficient reforming of *n*-heptane to aromatics

**Dan Xu<sup>a,c</sup>, Baoshan Wu<sup>a,b,\*</sup>, Pengju Ren<sup>a,b</sup>, Shuyuan Wang<sup>a,c</sup>, Chunfang Huo<sup>a,b</sup>,  
Bin Zhang<sup>a</sup>, Wenping Guo<sup>b</sup>, Lihua Huang<sup>b</sup>, , Xiaodong Wen<sup>a,b</sup>, Yong Qin<sup>a</sup>, Yong  
Yang<sup>a,b,\*</sup>, Yongwang Li<sup>a,b,\*</sup>**

<sup>a</sup> State Key Laboratory of Coal Conversion, Institute of Coal Chemistry, Chinese Academy of  
Sciences, Taiyuan 030001, People's Republic of China

<sup>b</sup> National Energy Research Center for Clean Fuels, Synfuels China Co., Ltd, Beijing 101400,  
People's Republic of China

<sup>c</sup> University of Chinese Academy of Sciences, Beijing 100049, People's Republic of China

---

\*Corresponding authors. +86 010 69667779.  
E-mail addresses: wbs@sxicc.ac.cn, yyong@sxicc.ac.cn and ywl@sxicc.ac.cn.

1. Preparation of 0.50 wt% Pt/KL catalyst by incipient wetness impregnation (IWI)

Supported Pt/KL catalyst with 0.50 wt% Pt loading was also prepared by the IWI method. In a typical synthesis,  $\text{Pt}(\text{NH}_3)_4\text{Cl}_2$  was weighed, dissolved in de-ionized water, and impregnated over the dry support by slowly dropping the solution under air atmosphere for 12 h. Next, the mixture was dried in an oven at 120 °C overnight and then calcined at 350 °C for 4 h in static air to yield the final catalyst. The catalyst is denoted as 0.50 wt% Pt/KL.

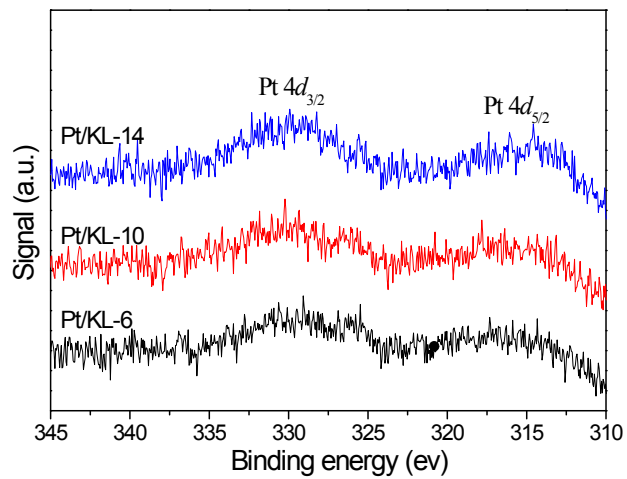

**Fig. S1** XPS patterns of Pt4d photoemission spectra of Pt/KL catalysts

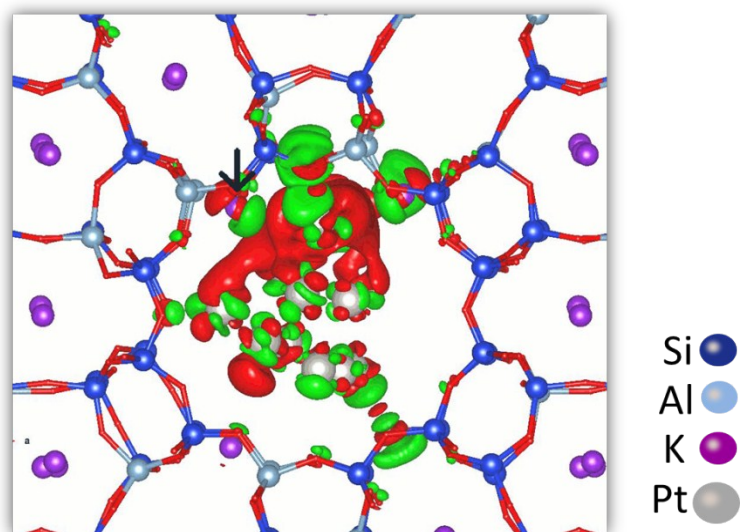

**Fig. S2** Charge density difference in a Pt/KL sample

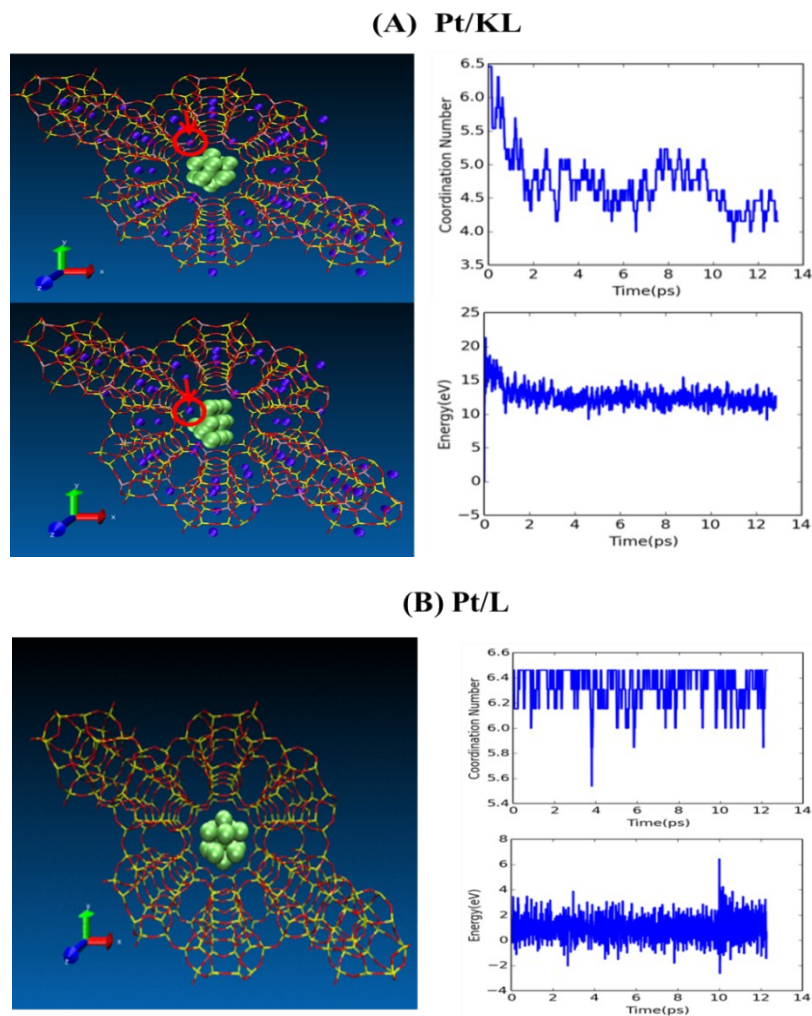

**Fig. S3** AIMD simulation of Pt/KL (A) and Pt/L (B) catalysts

Fig. S3 shows the ab initio molecular dynamics (AIMD) simulation about the effect of  $K^+$  cation on the morphology of Pt particle. Fig. S3(A) indicates that Pt particle inside KL zeolite channel could move easily and approach to  $K^+$  cations, which may induce the translocation of  $K^+$  position in the KL zeolite. When  $K^+$  cation is removed from the KL zeolite, Pt particle keeps the isolated structure inside the L zeolite channel (Fig. S3(B)), which has a slight interaction with the zeolite.
